# Supplementary material
Source: publisher site journal article supplement (https://www.dovepress.com/article/434588)
Supplement: Supplementary file 1 [file get_supplementary_file.php]

**Supplementary Information**

**The Pharmacokinetics, Safety and Tolerability of Aclidinium Bromide 400 μg Administered by Inhalation as Single and Multiple (Twice Daily) Doses in Healthy Chinese Participants**

Weimin Li1, Sami Z Daoud2, Roopa Trivedi3, Pradeep B Lukka4, Eulalia Jimenez5, Eduard Molins5, Catherine Stewart6, Pranob Bharali3,7, Esther Garcia-Gil8

1Clinical Trial Center, West China Hospital of Sichuan University, Chengdu, Sichuan Province, China

2Respiratory & Immunology, BioPharmaceuticals R&D, AstraZeneca, Gaithersburg, MD, USA

3Late Respiratory & Immunology, BioPharmaceuticals R&D, AstraZeneca, Durham, NC, USA

4Clinical & Quantitative Pharmacology, Clinical Pharmacology & Safety Sciences, R&D, AstraZeneca, Gaithersburg, MD, USA

5Clinical & Quantitative Pharmacology, Clinical Pharmacology & Safety Sciences, R&D, AstraZeneca, Barcelona, Spain

6Statistics, Phastar, Chiswick, London, UK

7BioPharmaceuticals R&D Late-stage Development, AstraZeneca India Pvt Ltd., Bangalore, Karnataka, India

8Respiratory & Immunology, BioPharmaceuticals R&D, AstraZeneca, Barcelona, Spain

***Corresponding author:*** Sami Z Daoud, Respiratory & Immunology, BioPharmaceuticals R&D, AstraZeneca, One MedImmune Way, Gaithersburg, MD 20878, USA.
Email: Sami.Daoud@astrazeneca.com. Tel: +1 302-598-8614

**Supplementary Table 1** Hematology and Chemistry Laboratory Variables Over Time (Safety Analysis Set; N = 20)

| **Laboratory Parameter** | **Mean (SD)** | | |
| --- | --- | --- | --- |
| **Baseline** | **Day 11** | **Change from Baseline** |
| Basophils (109/L) | 0.05 (0.07) | 0.03 (0.01) | -0.02 (0.07) |
| Eosinophils (109/L) | 0.17 (0.14) | 0.15 (0.11) | -0.02 (0.07) |
| Erythrocytes (1012/L) | 4.90 (0.54) | 4.81 (0.66) | -0.09 (0.25) |
| Hematocrit ratio | 0.45 (0.04) | 0.43 (0.04) | -0.01 (0.02) |
| Hemoglobin (g/L) | 145.65 (13.56) | 144.75 (16.15) | -0.90 (6.42) |
| Leukocytes (109/L) | 6.57 (1.45) | 6.27 (1.36) | -0.30 (1.26) |
| Lymphocytes (109/L) | 2.04 (0.53) | 1.98 (0.44) | -0.07 (0.36) |
| Monocytes (109/L) | 0.47 (0.13) | 0.40 (0.12) | -0.07 (0.08) |
| Neutrophils (109/L) | 3.86 (1.35) | 3.72 (1.12) | -0.14 (1.14) |
| Platelets (109/L) | 228.50 (43.44) | 230.65 (39.08) | 2.15 (35.08) |
| Alanine aminotransferase (μkat/L) | 0.35 (0.14) | 0.40 (0.16) | 0.05 (0.07) |
| Albumin (g/L) | 48.65 (2.07) | 47.94 (2.15) | -0.72 (1.87) |
| Alkaline phosphatase (μkat/L) | 1.20 (0.39) | 1.25 (0.36) | 0.05 (0.12) |
| Aspartate aminotransferase (μkat/L) | 0.32 (0.07) | 0.32 (0.08) | 0.01 (0.04) |
| Bilirubin (μmol/L) | 11.03 (4.34) | 10.88 (2.78) | -0.15 (3.99) |
| Calcium (mmol/L) | 2.34 (0.10) | 2.28 (0.07) | -0.06 (0.10) |
| Chloride (mmol/L) | 102.92 (1.23) | 101.67 (2.13) | -1.25 (1.86) |
| Cholesterol (mmol/L) | 4.14 (0.74) | 4.09 (0.76) | -0.06 (0.60) |
| Creatine kinase (μkat/L) | 1.96 (1.22) | 1.26 (0.71) | -0.70 (1.09) |
| Creatinine (µmol/L) | 71.60 (19.38) | 74.25 (17.22) | 2.65 (5.60) |
| Gamma glutamyl transferase (μkat/L) | 0.31 (0.16) | 0.35 (0.20) | 0.04 (0.06) |
| Glucose (mmol/L) | 5.07 (0.36) | 4.75 (0.25) | -0.31 (0.26) |
| Lactate dehydrogenase (μkat/L) | 2.58 (0.35) | 2.37 (0.26) | -0.20 (0.26) |
| Phosphate (mmol/L) | 1.07 (0.13) | 1.15 (0.15) | 0.08 (0.10) |
| Potassium (mmol/L) | 4.21 (0.22) | 4.10 (0.30) | -0.11 (0.33) |
| Protein (g/L) | 75.05 (4.49) | 74.50 (3.62) | -0.55 (3.41) |
| Sodium (mmol/L) | 140.67 (1.55) | 138.73 (1.97) | -1.94 (1.81) |
| Triglycerides (mmol/L) | 1.04 (0.44) | 1.42 (0.56) | 0.38 (0.52) |
| Urate (µmol/L) | 314.20 (70.07) | 329.35 (71.55) | 15.15 (42.94) |
| Urea nitrogen (mmol/L) | 4.28 (1.20) | 4.33 (0.95) | 0.06 (0.71) |

**Notes:** Baseline is last non-missing result available prior to first dose. Change from baseline is post-dose visit value – baseline value.

**Abbreviations:** SD, standard deviation.

**Supplementary Figure 1** Semi-logarithmic Geometric Mean Plasma Concentration (pg/mL) of (**A**) Aclidinium, (**B**) LAS34823 and (**C**) LAS35840 Versus Time: Day 1 and Day 9

**
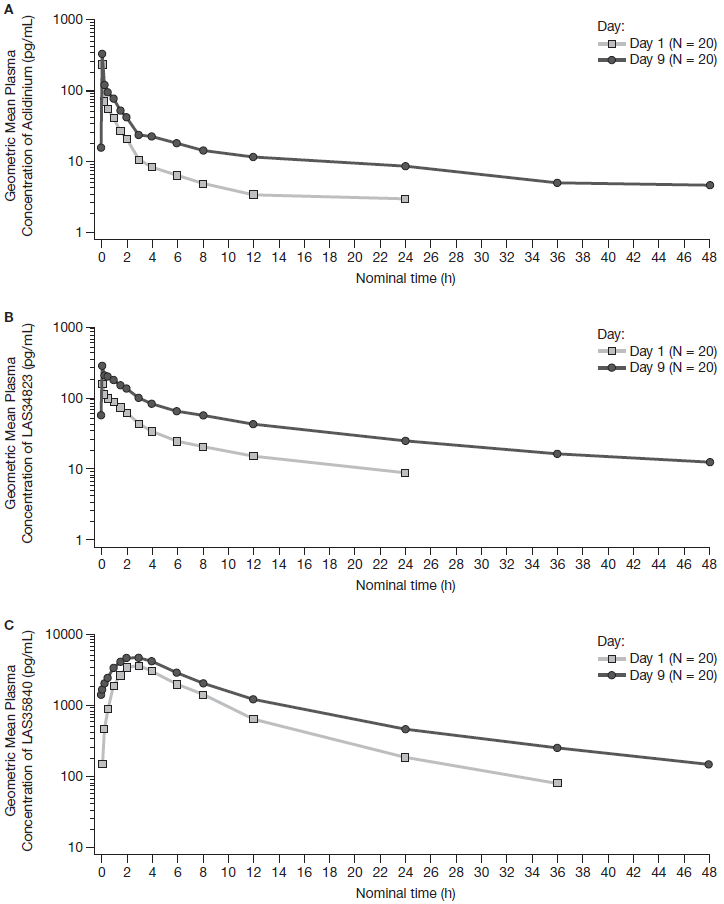
**

**Notes:** Plasma concentration axes display a semi-logarithmic scale. Data points are displayed only if ≥3 concentrations are available for each timepoint.
**Abbreviations:** h, hours.
